# Supplementary material for: Novel Zirconium doped V2O5 nanoparticles for effective biological applications: an experimental and theoretical approach
Source: Research Square preprint supplement (doi:10.21203/rs.3.rs-7700511/v1), 2025-10-15
Supplement: Supplementary file 1 [file 03659f0e20e77df02ecdd5fb.docx]

**Fig.S1.** EDX spectrum of Zr doped V2O5 nanoparticles

**Fig. S2.** PL spectrum of V2O5 and Zr doped V2O5 nanoparticles

**Fig. S3** DOS plot ofZr@V2O5.

**Fig. S4** Ramachandran plot of protein 2W9S.

**Fig.S5**. Zr doped V2O5 nanoparticles binding with Dihydrofolate reductase (DHFR) (PDB ID 2W9S) chain A protein


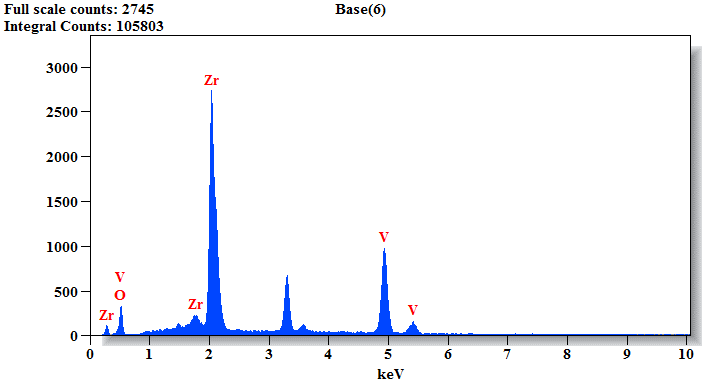


**Fig.S1.** EDX spectrum of Zr doped V2O5 nanoparticles


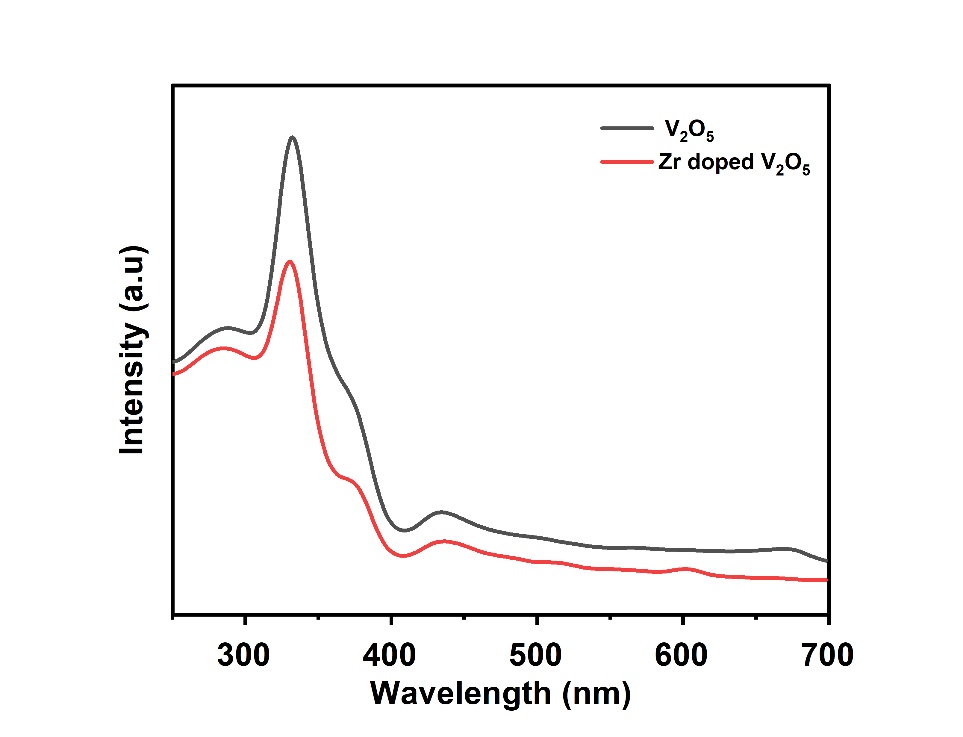


**Fig. S2.** PL spectrum of V2O5 and Zr doped V2O5 nanoparticles


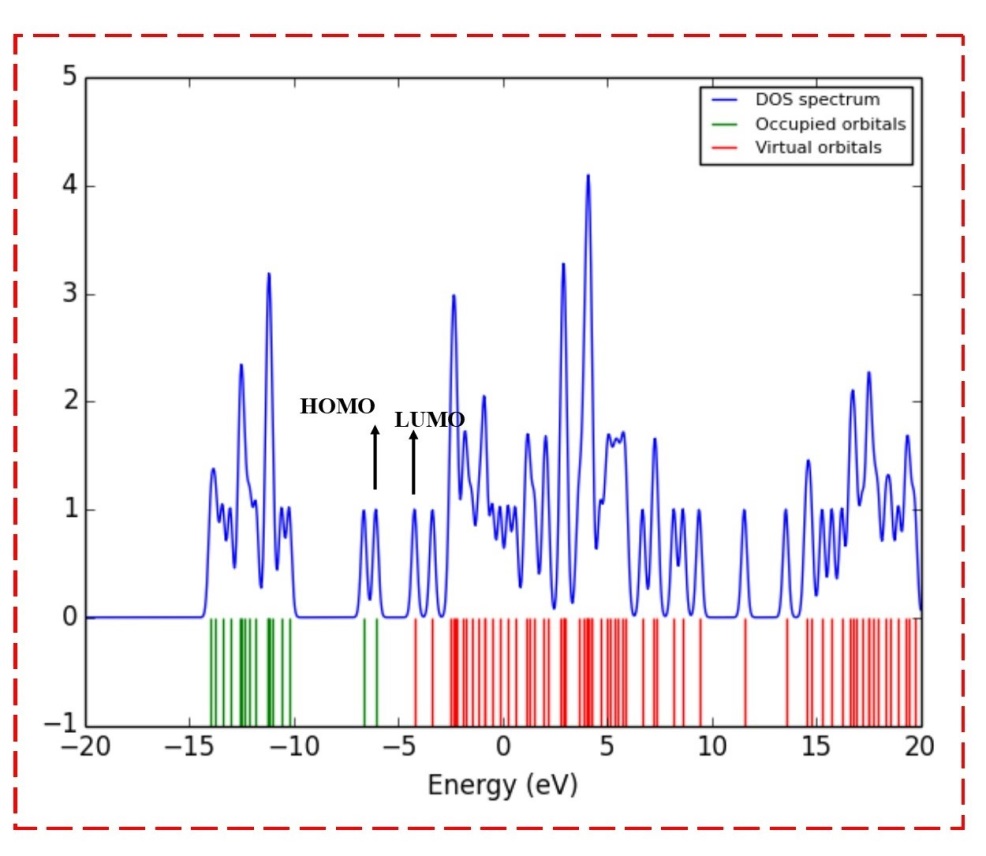


**Fig. S3** DOS plot ofZr@V2O5.


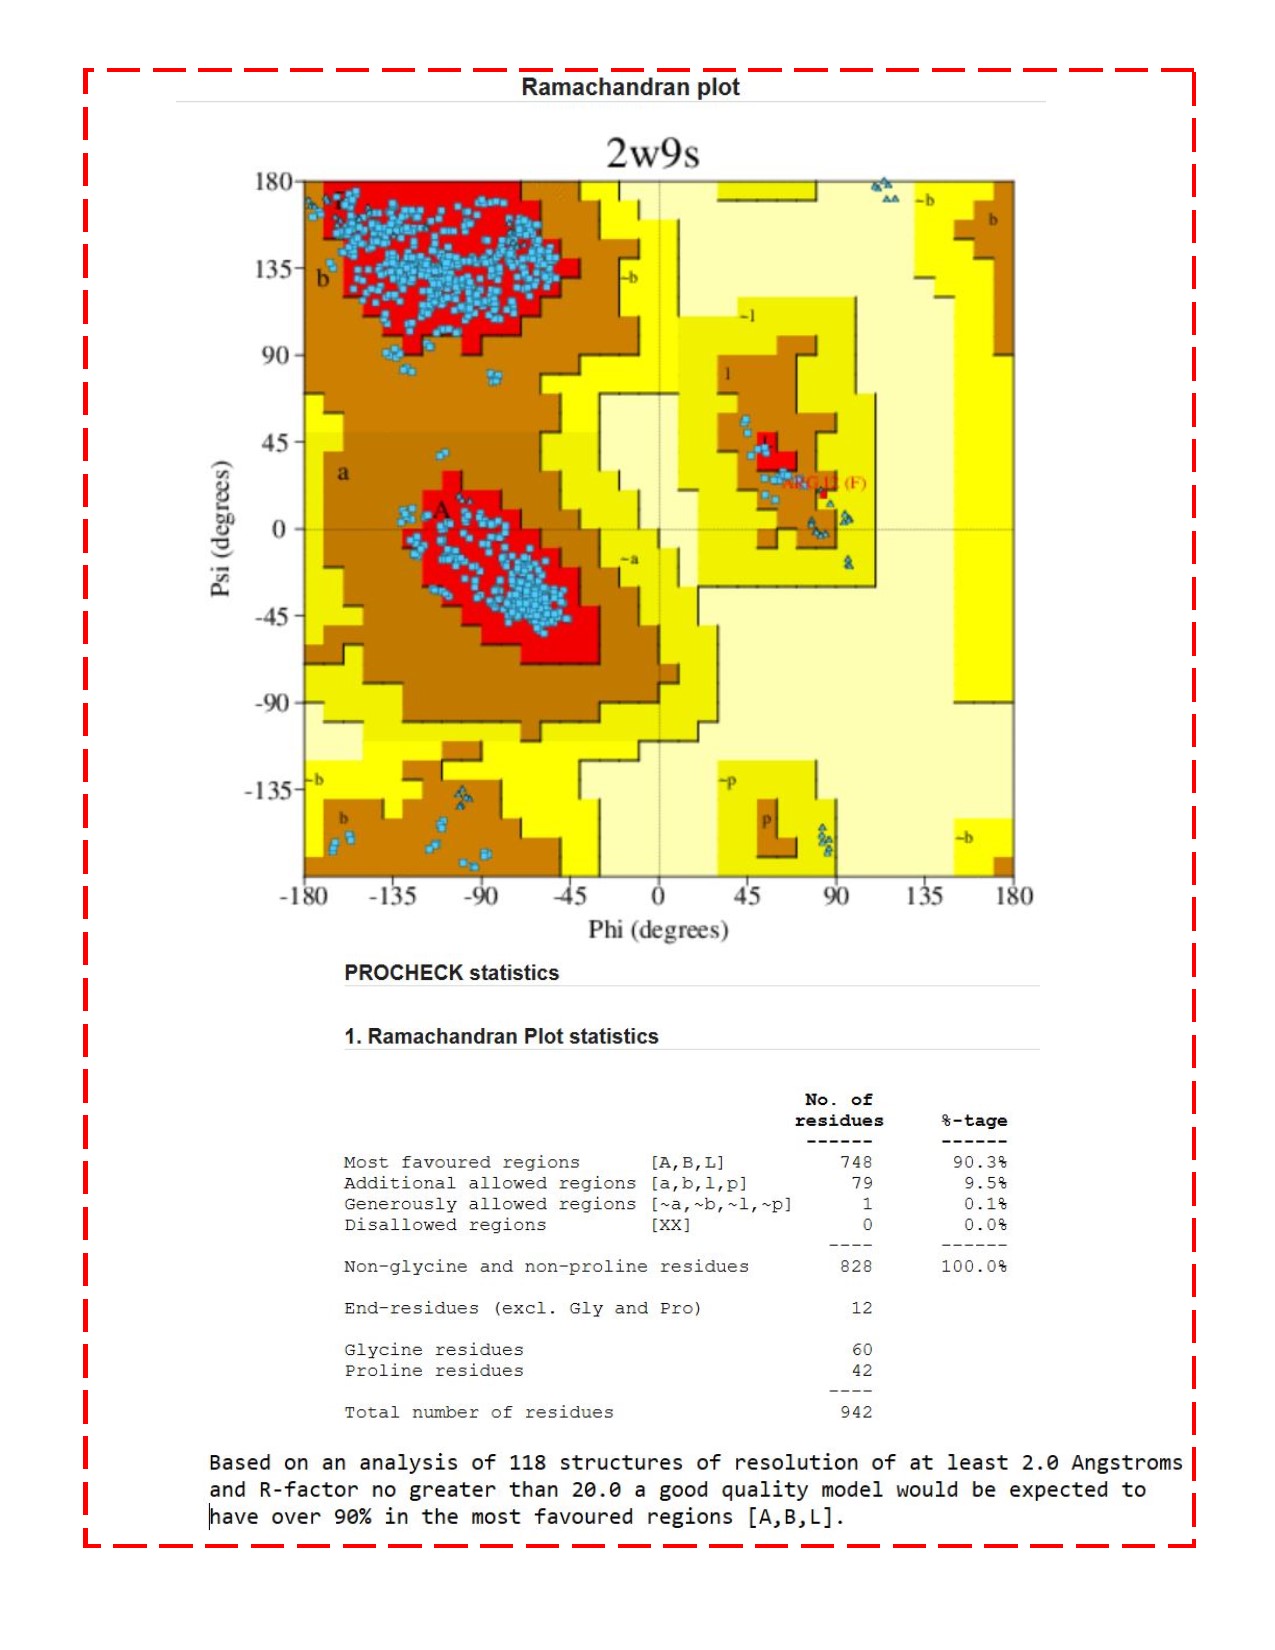


**Fig. S4** Ramachandran plot of protein 2W9S


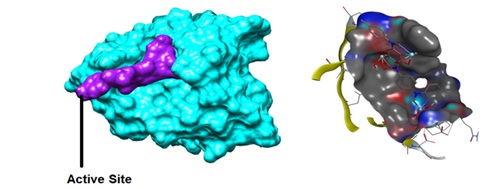


**Fig. S5**. Zr doped V2O5 nanoparticles binding with Dihydrofolate reductase (DHFR) (PDB ID 2W9S) chain A protein
