# Supplementary material for: Novel Zirconium doped V2O5 nanoparticles for effective biological applications: an experimental and theoretical approach
Source: Research Square preprint supplement (doi:10.21203/rs.3.rs-7700511/v1), 2025-10-15
Supplement: Supplementary file 2 [file d3f91ee861bdc1923d542b1f.docx]

**Table captain**

**Table 1**: Calculated HOMO energy (EH), LUMO energy (EL), HOMO-LUMO energy gap (Eg), Fermi level energy (EF) and work function (ϕ), Electronegativity χ, Chemical potential μ, Chemical softness S, Electrophilicity index ω, electron donating capability (ω-.), electron accepting capability (ω+) of Zr@V2O5. All data are in eV.

**Table-2**: Some standard thermodynamical parameters of Zr@V2O5 in gas phase.

**Table 3**, QTAIM topological parameters for electron density ρ(r), Laplacian of electron density ∇2ρ(r), kinetic electron density G(r), potential electron density V(r), eigenvalues of Hessian matrix (λ), and bond ellipticity index (ε) at the BCPs (3,-1) of Zr@V2O5 in gas phase.

**Table 4.** Zones of inhibition (mm) values against the *Salmonella typhi* and *Lactobacillus acidophilus* for V2O5

**Table 5.** Zones of inhibition (mm) values against the *Salmonella typhi* and *Lactobacillus acidophilus* for Zr doped V2O5 nanoparticles

**Table 1**: Calculated HOMO energy (EH), LUMO energy (EL), HOMO-LUMO energy gap (Eg), Fermi level energy (EF) and work function (ϕ), Electronegativity χ, Chemical potential μ, Chemical softness S, Electrophilicity index ω, electron donating capability (ω-.), electron accepting capability (ω+) of Zr@V2O5. All data are in eV.

| **Parameters** | **V2O5** | **Zr@V2O5** |  |
| --- | --- | --- | --- |
| HOMO(eV) | -8.83 | -5.6 |  |
| LUMO(eV) | -6.19 | -3.2 |  |
| Ionization potential (IP) | 8.83 | 5.6 |  |
| Electron affinity (EA) | 6.19 | 3.2 |  |
| Energy gap Eg (eV) | 2.6 | 2.3 |  |
| Fermi level EF (eV) | -7.51 | -4.4 |  |
| Work function ϕ(eV) | 7.51 | 4.4 |  |
| Electronegativity χ | 7.51 | 4.4 |  |
| Chemical potential μ | -7.51 | -4.4 |  |
| Chemical hardness η | 1.32 | 1.2 |  |
| Chemical softness S | 0.38 | 0.4 |  |
| Electrophilicity index ω | 21.3 | 8.3 |  |
| electronic charge | 5.69 | 3.8 |  |
| electron donating capability (ω-.) | 25.3 | 10.7 |  |
| electron accepting capability (ω+) | 17.8 | 6.2 |  |

**Table-2**: Some standard thermo dynamical parameters of Zr@V2O5 in gas phase.

| **Parameters** | Zr@V2O5 |
| --- | --- |
| Thermal energy (kcal/mol) | 16.393 |
| Specific heat (CV) (cal/mol-K) | 29.449 |
| Entropy (S) (cal/mol-K) | 101.502 |
| ZPVE (kcal/mol) | 10.495 |
| Gibbs free energy (G) (kcal/mol) | -39.640 |

**Table 3**, QTAIM topological parameters for electron density ρ(r), Laplacian of electron density ∇2ρ(r), kinetic electron density G(r), potential electron density V(r), eigenvalues of Hessian matrix (λ), and bond ellipticity index (ε) at the BCPs (3,-1) of Zr@V2O5 in gas phase.

| System | Bond | ρ(r) | ∆2 ρ(r) | G (r) | V(r) | V(r) /G(r) | λ1 | λ2 | λ3 | ε | Ent  (kJ/mol) |
| --- | --- | --- | --- | --- | --- | --- | --- | --- | --- | --- | --- |
| Zr@V2O5 | 2O…6O | 0.010 | 0.038 | 0.0078 | -0.0060 | 0.7692 | 0.049 | -0.003 | -0.007 | 0.146 | **7.9** |
| 3O…Zr | 0.009 | 0.020 | 0.0049 | -0.0047 | 0.9592 | 0.034 | -0.007 | -0.006 | 0.212 | **6.2** |

**Table 4.** Zones of inhibition (mm) values against the *Salmonella typhi* and *Lactobacillus acidophilus* for V2O5

| **Compound** | **Organisms** | **Concentration(µg/mL)** | | | **(D)**  **Antibiotic**  **(1mg/ml)** |
| --- | --- | --- | --- | --- | --- |
| **50 (A)** | **75 (B)** | **100 (C)** |
| V2O5 | *Salmonella typhi* | 7 | 7 | 7 | 11 |
|
| *Lactobacillus acidophilus* | 6 | 7 | 8 | 21 |

**Table 5.** Zones of inhibition (mm) values against the *Salmonella typhi* and *Lactobacillus acidophilus* for Zr doped V2O5 nanoparticles

| **Compound** | **Organisms** | **Concentration(µg/mL)** | | | **(D)**  **Antibiotic**  **(1mg/ml)** |
| --- | --- | --- | --- | --- | --- |
| **50 (A)** | **75 (B)** | **100 (C)** |
| Zr doped V2O5 | *Salmonella typhi* | 9 | 10 | 11 | 12 |
|
| *Lactobacillus acidophilus* | 8 | 10 | 11 | 21 |
